# Supplementary material
Source: MDPI journal article supplement (https://www.mdpi.com/2413-4155/2/2/24)
Supplement: s1 [file s1]

# SOX2OT Long Noncoding RNA Is Regulated by the UPR in Oestrogen Receptor-Positive Breast Cancer

Carole Ferraro-Peyret <sup>1,2,3,\*</sup>, Marjan E. Askarian-Amiri <sup>1,4</sup>, Debina Sarkar <sup>1,4,5</sup>, Wayne R. Joseph <sup>1</sup>, Herah Hansji <sup>1,4,6</sup>, Bruce C. Baguley <sup>1</sup> and Euphemia Y. Leung <sup>1,4,\*</sup>

<sup>1</sup> Auckland Cancer Society Research Centre, University of Auckland, 85 Park Rd, Grafton, Auckland 1023, New Zealand;

<sup>2</sup> Univ Lyon, ISPB Faculty of Pharmacy, INSERM 1052, CNRS5286, Cancer Research Centre of Lyon, F-69008 Lyon, France

<sup>3</sup> Hospices Civils de Lyon, Biopathology of Tumours, GHE Hospital, F-69500 Bron, France

<sup>4</sup> Molecular Medicine and Pathology Department, University of Auckland, 85 Park Rd, Grafton, Auckland 1023, New Zealand

<sup>5</sup> Biochemistry Department, University of Otago, 710 Cumberland Street, Dunedin North, Dunedin 9016, New Zealand

<sup>6</sup> Murdoch Children's Research Institute, The Royal Children's Hospital, Flemington Rd, Parkville VIC 3052, Australia

\* Correspondence: carole.ferraro-peyret@univ-lyon1.fr (C.F.-P.); e.leung@auckland.ac.nz (E.Y.L.)

Received: 6 March 2020; Accepted: 20 March 2020; Published: date

**Table 1.** List of primers used in these experiments.

|          |                                 |
|----------|---------------------------------|
| ATF4-F   | 5'- GTTCTCCAGCGACAAGGCTA-3'     |
| ATF4-R   | 5'- ATCCTGCTTGCTGTTGTTGG-3'     |
| BiP-F    | 5'- TGTTCACCAATTATCAGCAAACTC-3' |
| BiP-R    | 5'- TTCTGCTGTATCCTCTTCACCACT-3' |
| CHOP-F   | 5'- AGAACCAGGAAACGGAAACAGA-3'   |
| CHOP-R   | 5'- TCTCCTTCATGCGCTGCTTT-3'     |
| SOX2OT-F | 5'- GCTCGTGGCTTAGGAGATTG -3'    |
| SOX2OT-R | 5'- CTGGCAAAGCATGAGGAACT -3'    |
| SOX2-F   | 5'-AACCCCAGATGCACAA CTC-3'      |
| SOX2-R   | 5'-GCTTAGCCTCGTCGATGAAC-3'      |
| XBP1s-F  | 5'- CCTGGTTGCTGAAGAGGAGG-3'     |
| XBP1s-R  | 5'- CCATGGGGAGATGTTCTGGAG -3'   |
| HPRT-F   | 5'-TGAGGATTGGAAAGGGTGT-3'       |
| HPRT-R   | 5'-GCACACAGAGGGCTACAATG-3'      |
| GAPDH-F  | 5'-ACGGG AAGCTTGTCAAT-3'        |
| GAPDH-R  | 5'-TGGACTCCACGACGTACTCA-3'      |
| HPRT-F   | 5'-TGAGGATTGGAAAGGGTGT-3'       |
| HPRT-R   | 5'-GCACACAGAGGGCTACAATG-3'      |

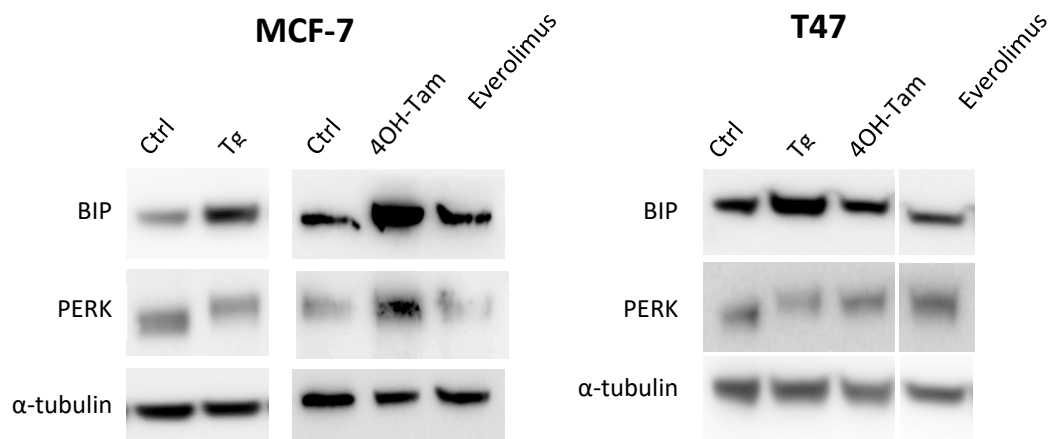

**Figure S1.** Expression of *SOX2OT* lncRNA and *SOX2* following UPR induction in ER+ breast cancer cell lines. MCF-7 (A) and T47D (B) cells were incubated in control medium (Ctrl) or in medium containing the ER stress-inducing agents thapsigargin (Tg, 300 nM), 4OH-Tam (0.1uM) or everolimus (10nM) for 16h. Protein expression levels of PERK and BIP protein expression were examined using Western Blot analysis.  $\alpha$ -tubulin was used as internal control. Blots of Bip, PERK, and  $\alpha$ -tubulin have been performed on the same electrophoresis gel, but cut and reconstituted.

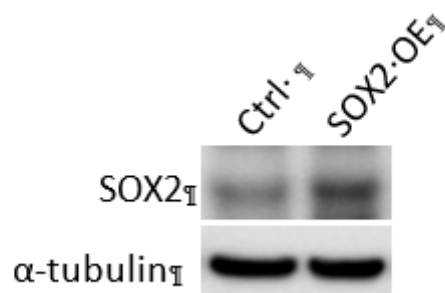

**Figure S2.** Comparison of SOX2 expression in control and SOX2 overexpressing MDA-MB-231. SOX2 protein expression was examined using Western Blot analysis.  $\alpha$ -tubulin was used as internal control. Ctrl, control; SOX2 OE, SOX2 overexpression.

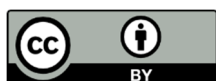

© 2020 by the authors. Submitted for possible open access publication under the terms and conditions of the Creative Commons Attribution (CC BY) license (<http://creativecommons.org/licenses/by/4.0/>).
